# Lipid Rescue Reverses the Bupivacaine-induced Block of the Fast Na<sup>+</sup> Current (I<sub>Na</sub>) in Cardiomyocytes of the Rat Left Ventricle

Michael Wagner, M.D., Ph.D., York A. Zausig, D.E.A.A., M.D., Ph.D., Stefan Ruf, M.S., Elena Rudakova, Ph.D., Michael Gruber, Ph.D., Bernhard M. Graf, M.D., Ph.D., Tilmann Volk, M.D., Ph.D.

## ABSTRACT

**Background:** Cardiovascular resuscitation upon intoxication with lipophilic ion channel-blocking agents has proven most difficult. Recently, favorable results have been reported when lipid rescue therapy is performed, *i.e.*, the infusion of a triglyceride-rich lipid emulsion during resuscitation. However, the mechanism of action is poorly understood.

**Methods:** The authors investigate the effects of a clinically used lipid emulsion (Lipovenös® MCT 20%; Fresenius Kabi AG, Bad Homburg, Germany) on the block of the fast Na<sup>+</sup> current (I<sub>Na</sub>) induced by the lipophilic local anesthetic bupivacaine in adult rat left ventricular myocytes by using the whole cell patch clamp technique.

**Results:** Bupivacaine at 10 μM decreased I<sub>Na</sub> by 54% (−19.3 ± 1.9 pApF<sup>−1</sup> *vs.* −42.3 ± 4.3 pApF<sup>−1</sup>; n = 17; *P* < 0.001; V<sub>pip</sub> = −40 mV, 1 Hz). Addition of 10% lipid emulsion in the presence of bupivacaine produced a 37% increase in I<sub>Na</sub> (−26.4 ± 2.8 pApF<sup>−1</sup>; n = 17; *P* < 0.001 *vs.* bupivacaine alone). To test whether these results could be explained by a reduction in the free bupivacaine concentration by the lipid (lipid-sink effect), the authors removed the lipid phase from the bupivacaine–lipid mixture by ultracentrifugation. Also, the resulting water phase led to an increase in I<sub>Na</sub> (+19%; n = 17; *P* < 0.001 *vs.* bupivacaine), demonstrating that part of the bupivacaine had been removed during ultracentrifugation. The substantially less lipophilic mepivacaine (40 μM) reduced I<sub>Na</sub> by 27% (n = 24; *P* < 0.001). The mepivacaine–lipid mixture caused a significant increase in I<sub>Na</sub> (+17%; n = 24; *P* < 0.001). For mepivacaine, only a small lipid-sink effect could be demonstrated (+8%; n = 23; *P* < 0.01), reflecting its poor lipid solubility.

**Conclusion:** The authors demonstrate lipid rescue on the single-cell level and provide evidence for a lipid-sink mechanism. (ANESTHESIOLOGY 2014; 120:724–36)

ACCIDENTAL systemic toxicity of local anesthetics (LA) is a rare but potentially life-threatening complication of regional anesthesia.<sup>1,2</sup> The symptoms usually involve the central nervous system and the heart, ranging from rather harmless signs such as mild discomfort, nausea, dizziness, or minor electrocardiogram changes up to seizures, coma, ventricular fibrillation, and asystole.<sup>1</sup> Therapy of severe systemic LA intoxication consisted of advanced cardiac life support and has been a challenge because no specific therapy was available. This situation started to change some 15 yr ago, when infusion of a commercially available lipid emulsion was shown to effectively treat intoxications with the lipophilic LA bupivacaine in rats<sup>3</sup> and later in dogs also.<sup>4</sup> Only a few years later, the concept was transferred to the clinic, when patients with LA

### What We Already Know about This Topic

- Cardiovascular resuscitation secondary to intoxication with lipophilic ion channel-blocking agents has proven to be a significant therapeutic challenge. Recently, favorable results have been reported when lipid rescue therapy is performed.
- This study determined whether the application of a clinically used lipid emulsion might reverse the bupivacaine-induced changes in the action potential and the fast Na<sup>+</sup> current (I<sub>Na</sub>) of left ventricular cardiomyocytes and compared the results with those obtained with the hydrophilic local anesthetic mepivacaine

### What This Article Tells Us That Is New

- The study demonstrates that a lipid emulsion partially reverses the effects of bupivacaine on the action potential and the fast Na<sup>+</sup> current of left ventricular cardiomyocytes and provides evidence for a lipid-sink mechanism

Supplemental Digital Content is available for this article. Direct URL citations appear in the printed text and are available in both the HTML and PDF versions of this article. Links to the digital files are provided in the HTML text of this article on the Journal's Web site ([www.anesthesiology.org](http://www.anesthesiology.org)). This work has been presented in part at the 91st Meeting of the German Physiological Society, Dresden, Germany, March 23, 2012; the 59th Annual Meeting of the German Society for Anesthesiology and Intensive Care Medicine, Leipzig, Germany, May 5, 2012; the 92nd Annual Meeting of the German Physiological Society, Heidelberg, Germany, March 3, 2013; and the 79th Annual Meeting of the German Cardiac Society, Mannheim, Germany, April 5, 2013. Drs. Wagner and Zausig contributed equally to this work. Drs. Graf and Volk contributed equally to this work.

Submitted for publication April 30, 2013. Accepted for publication July 17, 2013. From the Institut für Zelluläre und Molekulare Physiologie, Friedrich-Alexander-Universität Erlangen-Nürnberg, Erlangen, Germany (M.W., E.R., S.R., T.V.); and Klinik für Anästhesiologie, Universitätsklinikum Regensburg, Regensburg, Germany (Y.A.Z., M.G., B.M.G.).

Copyright © 2013, the American Society of Anesthesiologists, Inc. Lippincott Williams & Wilkins. Anesthesiology 2014; 120:724–36

intoxication refractory to conventional treatment were successfully treated with infusion of a lipid emulsion.<sup>5,6</sup> Since then, numerous case reports have been published reporting the successful use of lipid emulsion therapy in intoxications with LAs and, more recently, other lipophilic drugs<sup>7</sup> and, moreover, lipid infusion has meanwhile been included in resuscitation guidelines.<sup>8</sup>

To date, the mechanism of action of lipid resuscitation is not well understood. Among different concepts, the so-called lipid-sink hypothesis suggests an accumulation of the lipophilic LA in the lipid phase of the lipid emulsion, thereby decreasing the concentration of the LA in the water phase and hence in the tissue.<sup>9</sup> According to this concept, there are experimental observations that lipid emulsion infusion is effective in the treatment of intoxications with the lipophilic LA bupivacaine, but not with the less lipophilic LAs mepivacaine<sup>10</sup> and ropivacaine.<sup>11,12</sup> Moreover, with increasing concentrations of the lipid, a decrease in the myocardial concentration of bupivacaine was observed.<sup>13</sup> However, lipid resuscitation has also been successfully applied to intoxications with the substantially less lipophilic LA lidocaine,<sup>14</sup> suggesting additional modes of action.

Although the exact mechanism of action is not clearly understood, a common clinical observation reported during the application of the lipid emulsion in patients is a rapid improvement in electrocardiogram alterations, *i.e.*, shortening of the QRS complexes, decrease in QTc-interval, or termination of ventricular arrhythmias.<sup>15,16</sup> This suggests a rather rapid action of the lipid emulsion on the effects of the LA on the cardiac action potential (AP) and hence, the underlying ion channels.

In the current study, we therefore asked whether the application of a clinically used lipid emulsion might reverse the bupivacaine-induced changes in the AP and the fast Na<sup>+</sup> current ( $I_{Na}$ ) of left ventricular cardiomyocytes and compared the results with those obtained with the hydrophilic LA mepivacaine. We show that a lipid emulsion partially reverses the effects of bupivacaine on the AP and the Na<sup>+</sup> current at the cellular level. Moreover, we provide evidence for a lipid-sink mechanism. Finally, by investigating the effect of lipid emulsion on the LA action on heterologously expressed hKv4.2 + hKChIP2b channels in *Xenopus laevis* oocytes, we show that the effect of the lipid emulsion is not limited to the AP and the Na<sup>+</sup> current in cardiomyocytes, but appears as to be a general mechanism on ion channels.

## Materials and Methods

### Isolation of Myocytes

The investigation conforms to the *Guide for the Care and Use of Laboratory Animals* published by the U.S. National Institutes of Health (National Institutes of Health Publication No. 85-23, revised 1996) and was approved by local government authorities (Government of Middle Franconia,

Ansbach, Germany). Myocytes were isolated from the cardiac left ventricular free wall of female Wistar rats (weighing approximately 220 g) as described previously.<sup>17,18</sup> Briefly, after induction of deep anesthesia by intraperitoneally injecting thiopental-sodium (100 mg/kg body mass; Inresa Arzneimittel GmbH, Freiburg, Germany), the heart was quickly excised and placed into cold (4°C) Tyrode solution where it stopped beating immediately. Subsequently, the heart was perfused with modified Tyrode solution containing 4.5 mM Ca<sup>2+</sup> and 5 mM EGTA (approximately 1  $\mu$ M free Ca<sup>2+</sup>) *via* the ascending aorta at 37°C for 5 min. The perfusion was continued for 19 min, recirculating 25 ml of the same solution containing collagenase (CLS type II, 160 U/ml; Biochrom KG, Berlin, Germany) and protease (type XIV, 0.6 U/ml; Sigma-Aldrich Corporation, St. Louis, MO). Finally, the heart was perfused with storage solution<sup>19</sup> containing 100  $\mu$ M Ca<sup>2+</sup> for 5 min. Using fine forceps, myocytes were carefully dissected from the subepicardial and the subendocardial layer of the left ventricular free wall and placed in cell culture dishes containing the same solution. Tissue pieces were minced and gently agitated to obtain single cardiomyocytes. After adaption to physiological Ca<sup>2+</sup> levels, cells were transferred to cell culture dishes containing storage solution supplemented with 100 U/ml penicillin and 0.1 mg/ml streptomycin, stored at 37°C in a water saturated atmosphere containing 5% CO<sub>2</sub> and used for experiments for up to 36 h. Only quiescent single rod-shaped cells with clear cross striations were used for experiments.

### Patch Clamp Technique

The ruptured-patch whole cell configuration was used as described previously.<sup>18,20</sup> Currents were recorded using an EPC-10 amplifier (HEKA Elektronik Dr. Schulze GmbH, Lambrecht, Germany), controlled by the PULSE-Software (HEKA). Membrane capacitance ( $C_m$ ) and series resistance ( $R_s$ ) were calculated using the automated capacitance compensation procedure of the EPC-10 amplifier. During AP measurements,  $R_s$  averaged  $6.8 \pm 2.9$  M $\Omega$  (mean  $\pm$  SD,  $n = 95$ ) and  $C_m$  was  $130.2 \pm 35.0$  pF (mean  $\pm$  SD,  $n = 95$ ). During  $I_{Na}$  measurements,  $R_s$  averaged  $5.2 \pm 1.7$  M $\Omega$  (mean  $\pm$  SD,  $n = 88$ ) and was compensated by 80%. This resulted in an average effective  $R_s$  of 1.0 M $\Omega$ , leading to an average voltage error of 5.5 mV (average current  $-5.3 \pm 2.4$  nA [mean  $\pm$  SD],  $n = 88$ ) for the native current, 2.5 mV (average current  $-2.4 \pm 1.0$  nA [mean  $\pm$  SD],  $n = 41$ ) when blocked with bupivacaine and 4.0 mV (average current  $-3.8 \pm 1.8$  nA [mean  $\pm$  SD],  $n = 47$ ) when blocked by mepivacaine (see also the section on limitations in the Discussion).  $C_m$  averaged  $115.8 \pm 24.3$  pF (mean  $\pm$  SD,  $n = 88$ ). Effective  $R_s$  and  $C_m$  resulted in an average time constant of 120  $\mu$ s for charging of the membrane capacitance. Together with the relatively slow kinetics of  $I_{Na}$  at  $-40$  mV at room temperature, this allowed the peak of the capacitive artifact to be clearly separated from the peak of the Na current. The capacitive artifact

was subtracted using a P/4 leak subtraction protocol. Pipette potentials were corrected for the liquid junction potential of 13 or 9 mV for the solution with reduced  $Na^+$  concentration, respectively. All experiments were performed at room temperature (22°–24°C). For each set of experiments, myocytes obtained from two to four rats were used. Some control experiments were performed on cells from one rat only. All reported potentials are pipette potentials.

Trains of 150 APs were elicited at 1 Hz in cells with a resting membrane potential negative to  $-80$  mV (a  $V_m$  positive to  $-80$  mV was considered to be secondary to a leaky electrical access to the myocyte) by depolarizing current pulses of 5 ms duration. After 50 APs, the solution was switched to the solution containing the LA (bupivacaine or mepivacaine). After another 50 APs, the solution was switched to the mixture of lipid emulsion and the LA. The last AP under each condition was evaluated.

To elicit  $I_{Na}$ , cells were clamped to  $-40$  mV for 20 ms and then for 80 ms to 0 mV. Holding potential was  $-90$  mV and cycle length was 1 s.  $I_{Na}$  was measured at the pulse to  $-40$  mV to assess the  $Na^+$  current during the upstroke of the AP while the pulse to 0 mV served to simulate the plateau phase of the AP. The standard protocol consisted of 200 pulses: 50 under control conditions, 50 with LA, 50 with LA plus lipid emulsion, and another 50 under control conditions. The last current under each condition was evaluated. Leak subtraction was applied using a P/4 protocol, and  $R_s$  and  $C_m$  were automatically readjusted before each pulse. The extracellular  $Na^+$  concentration was reduced to 20 mM by replacing 118 mM  $Na^+$  with  $Cs^+$ . Moreover, this inhibited the inward-rectifying  $K^+$  current,<sup>21</sup> thus rendering the leak subtraction possible. All experiments were conducted under continuous perfusion of 7 ml/min. Current and voltage recordings were low-pass filtered at 5 kHz and sampled at 25 kHz. To compensate for variability in cell size, currents were divided by the cell capacitance and are thus given as current densities in pApF<sup>-1</sup>.

### Isolation, Injection, and Maintenance of *X. laevis* Oocytes

Female *X. laevis* were anesthetized by immersing in tap water containing 0.2% MS-222 for 10 min. Ovarian lobes were surgically removed, and oocytes were isolated by enzymatic digestion using collagenase (CLS type II, 260 U/ml; Biochrom KG, Berlin, Germany) in  $Ca^{2+}$ -free OR2 solution at 10°C for 3–4 h. We used full-length complementary DNA transcripts encoding human Kv4.2 (hKv4.2) inserted in pGEM and human KChIP2b (hKChIP2b) included in pGEM-HJ. Linearized plasmids were used as templates for coding RNA synthesis using the mMessage mMachine Transcription Kit T7 (Life Technologies, Grand Island, NY). Defolliculated stage V and VI oocytes were injected with 0.1 ng hKv4.2 + 0.5 ng hKChIP2b coding RNA. Coding RNAs were dissolved in RNase-free water, and the total volume injected was 50 nl per oocyte. After injection, oocytes

were maintained in ND96 solution and were studied 2 days after injection.

### Two-electrode Voltage Clamp Experiments

Oocytes were transferred to a perfusion chamber, which is continuously superfused with NaCl-95 solution, and impaled with electrodes (0.1–1.5 MΩ) filled with 3 M KCl. To increase the Lipovenös® (Fresenius Kabi AG, Bad Homburg, Germany) content to more than 10% in the bath solution, a stock of a modified bath solution was designed which was diluted as needed with Lipovenös® or control to assure a constant  $K^+$  concentration of 4 mM and  $Ca^{2+}$  and  $Mg^{2+}$  concentrations of 1 mM each. Whole cell currents were measured at room temperature (19°–22°C) with the two-electrode voltage clamp technique using an OC-725C amplifier (Warner Instruments LLC, Hamden, CT) controlled by the Pulse-software (HEKA) via an LIH-1600 interface (HEKA). An Ag–AgCl pellet placed directly in the bath solution served as a reference electrode for the current injection circuit, whereas an additional Ag–AgCl pellet located close to the oocyte was used to sense the bath potential to minimize series resistance errors. Currents were elicited by voltage steps to +40 mV from a holding potential of  $-90$  mV. Pulsed current data were filtered at 1 kHz and sampled at 5 kHz.

### Measurement of LA Concentrations

Bupivacaine and mepivacaine concentrations were measured by gas chromatography–mass spectrometry using an Agilent model 6890plus gas chromatograph and an MSD 5973 in the electron impact selected ion monitoring mode (Agilent Technologies Inc., Santa Clara, CA). Extraction of the samples was adopted from the study by Colin *et al.*<sup>22</sup> Shortly, samples (50 μl) were extracted by fluid–fluid extraction using hexane:ethyl acetate (70:30, 4 ml) plus 0.05% Lipofundin® (20%; B. Braun Melsungen AG, Melsungen, Germany) and glycine buffer at pH 9.0 (250 μl), dried, solved in toluol:methanol (20:1, 250 μl) and injected into the gas chromatograph (0.2 μl, split mode 20:1 at 285°C). Ropivacaine ( $m/z = 126.1$  and retention time = 3.97 min) was used as internal standard for bupivacaine ( $m/z = 140.1$  and retention time = 4.18 min,  $r^2 = 0.99$ ) and mepivacaine ( $m/z = 98.1$  and retention time = 3.65 min,  $r^2 = 1.00$ ) quantification. Separation was achieved on a Phenomenex Zebron ZB-1ms column (30 m × 0.25 mm × 0.25 μm; Phenomenex Inc., Aschaffenburg, Germany) at a starting temperature and period of 200°C and 2 min followed by a linear temperature gradient (60 K/min) up to 300°C. Linearity of the detector was given over the whole concentration range with relative recovery rates of  $95.7 \pm 3.7\%$  (mepivacaine,  $n = 17$ ) and  $100.0 \pm 6.3\%$  (bupivacaine,  $n = 17$ ) and lower limits of quantification of 1.43 μM (mepivacaine) and 1.03 μM (bupivacaine).

### Solutions and Drugs

Modified Tyrode solution was used for cell isolation and as bath solution and contained NaCl, 138 mM; KCl, 4 mM;



MgCl<sub>2</sub>, 1 mM; NaH<sub>2</sub>PO<sub>4</sub>, 0.33 mM; CaCl<sub>2</sub>, 2 mM; glucose, 10 mM; and HEPES, 10 mM (pH 7.30 with NaOH). The Na<sup>+</sup> concentration was reduced to 20 mM by replacing 118 mM Na<sup>+</sup> with Cs<sup>+</sup> for measuring I<sub>Na</sub>. Myocyte storage solution contained NaCl, 130 mM; NaH<sub>2</sub>PO<sub>4</sub>, 0.4 mM; NaHCO<sub>3</sub>, 5.8 mM; MgCl<sub>2</sub>, 0.5 mM; CaCl<sub>2</sub>, 1 mM; KCl, 5.4 mM; glucose, 22 mM; and HEPES, 25 mM (pH 7.40 with NaOH in the presence of 5% CO<sub>2</sub>) and supplemented with 1 mg/ml bovine serum albumin (albumin fraction V; Merck KGaA, Darmstadt, Germany), 100 U/ml of penicillin, and 0.1 mg/ml of streptomycin. The pipette solution contained glutamic acid, 120 mM; KCl, 10 mM; MgCl<sub>2</sub>, 4 mM; EGTA, 10 mM; HEPES, 10 mM; and Na<sub>2</sub>ATP, 2 mM (pH 7.20 with KOH). ND96 solution contained NaCl, 96 mM; KCl, 2 mM; MgCl<sub>2</sub>, 1 mM; CaCl<sub>2</sub>, 1.8 mM; and HEPES, 5 mM (pH 7.40 with NaOH), supplemented with 100 U/ml of penicillin and 0.1 mg/ml of streptomycin (Sigma-Aldrich Corporation). NaCl-95 solution contained NaCl, 95 mM; KCl, 4 mM; MgCl<sub>2</sub>, 1 mM; CaCl<sub>2</sub>, 1 mM; and HEPES, 10 mM (pH 7.40 with Tris). The ×5 stock of the modified bath solution contained NaCl, 60 mM; KCl, 18.25 mM; MgCl<sub>2</sub>, 5 mM; CaCl<sub>2</sub>, 5 mM; and HEPES, 20 mM (pH 7.4 with NaOH).

Bupivacaine and mepivacaine were obtained from Sigma and were freshly dissolved in the bath solution on each day of experiments. Bupivacaine was used at a concentration of 10 μM in most experiments, a plasma concentration that can be reached in patients.<sup>16</sup> Mepivacaine was used at a concentration of 40 μM, a concentration that was reported to cause similar cardiotoxicity as 10 μM bupivacaine.<sup>10</sup> Experiments in which the lipid emulsion (Lipovenös® MCT 20%; Fresenius Kabi AG) was applied were started with a bath solution containing 10% of a control solution adapted to the Na<sup>+</sup> content (approximately 2 mM) and osmolarity (290 mOsm, adapted with mannitol in the control solution) of Lipovenös®. Eventually, the solution was exchanged to the same solution containing 10% of the lipid emulsion instead of control. Ultracentrifugation was performed at 40,000 rpm (110,000g) in an Optima L60 ultracentrifuge (Beckman Coulter Inc., Brea, CA) using a Ti70.1 rotor for 2 h at 4°C.

### Data Evaluation and Statistical Analysis

Data were analyzed using the PULSE-FIT software (HEKA), IGOR Pro (WaveMetrics Inc., Lake Oswego, OR), and Microsoft Excel (Microsoft Corporation, Redmond, WA) as described previously.<sup>18</sup> To indicate the precision of the mean values, average data are given together with the SEM (mean ± SEM) and the number of experiments if not stated otherwise. To report the variability of the data, means together with their respective SDs are given in the table, Supplemental Digital Content 1, <http://links.lww.com/ALN/A968>, and 95% CIs are detailed in the table, Supplemental Digital Content 2, <http://links.lww.com/ALN/A969>.<sup>23</sup> To estimate the reduction in the bupivacaine concentration by the lipid emulsion, concentration–response analysis was performed in the relevant range of concentrations assuming the previously

described complete block of I<sub>Na</sub> at high concentrations of bupivacaine.<sup>24</sup> Concentration–response curves of Kv channels were calculated at +40 mV from charge rather than current amplitude because bupivacaine and mepivacaine are open-channel blockers of Kv4 channels.<sup>25,26</sup> In both cases, a Hill function with variable slope was fitted to the data. Statistical significance was evaluated by paired or unpaired Student *t* test or paired or unpaired one-way ANOVA followed by a Newman–Keuls multiple comparison test when more than two groups were compared using Prism 5 (GraphPad Software Inc., La Jolla, CA). A two-tailed *P* value of less than 0.05 was considered statistically significant.

## Results

### Lipid Emulsion Reverses the Effects of Bupivacaine on the Upstroke of the AP

Action potentials were recorded to assess the overall effect of lipid rescue on the cardiac cellular electrophysiology. Because of the heterogeneity of AP duration (APD) within the rat left ventricular free wall,<sup>27</sup> myocytes from epicardial and endocardial regions were analyzed separately. Figure 1 depicts the effect of lipid rescue on the epicardial AP; 10 μM of the lipophilic bupivacaine, a concentration reportedly reached during intoxication,<sup>16</sup> significantly reduced the overshoot (fig. 1D; *P* < 0.001) and maximal upstroke velocity (by 56%; fig. 1E; *P* < 0.001) of the AP (table 1). Lipid rescue with 10% Lipovenös® partially reversed the effect on the overshoot (*P* < 0.001) and increased maximal upstroke velocity by 31% (*P* < 0.001; table 1). Similar effects were observed in endocardial myocytes (table 1). Bupivacaine also significantly increased APD to 50% (APD<sub>50</sub>) and 90% (APD<sub>90</sub>) repolarization, which was completely reversed by lipid rescue (fig. 1, F and G; table 1) in epicardial myocytes. In endocardial myocytes, AP prolongation by bupivacaine was less profound and, surprisingly, lipid rescue shortened APD<sub>90</sub> even below its duration measured under control conditions (table 1). Because the hydrophilic LA mepivacaine is reportedly less cardiotoxic than bupivacaine,<sup>10</sup> a fourfold higher dose was used. Similar to bupivacaine, 40 μM mepivacaine significantly reduced AP overshoot and upstroke velocity (*P* < 0.001 each; fig. 2, A–E; table 2). However, it did not significantly alter repolarization (fig. 2, F and G; table 2). As expected for a relatively hydrophilic LA, lipid rescue did not reverse the effects on overshoot and upstroke velocity. In fact, upstroke velocity was even slightly but significantly reduced by Lipovenös® (fig. 2, A–E; table 2). Surprisingly, Lipovenös® somewhat prolonged APD<sub>50</sub> (*P* < 0.001) and APD<sub>90</sub> (*P* < 0.05) in the presence of mepivacaine (fig. 2, F and G; table 1). Both LAs tended to slightly hyperpolarize the resting membrane potential. This effect was significant in some of the experiments (table 1). Lipovenös® did not have a consistent effect on the resting membrane potential. The tendency of Lipovenös® to prolong epicardial and to shorten endocardial APD was tested in a series of control experiments. Lipovenös® alone marginally but significantly prolonged APD<sub>90</sub> in epicardial myocytes

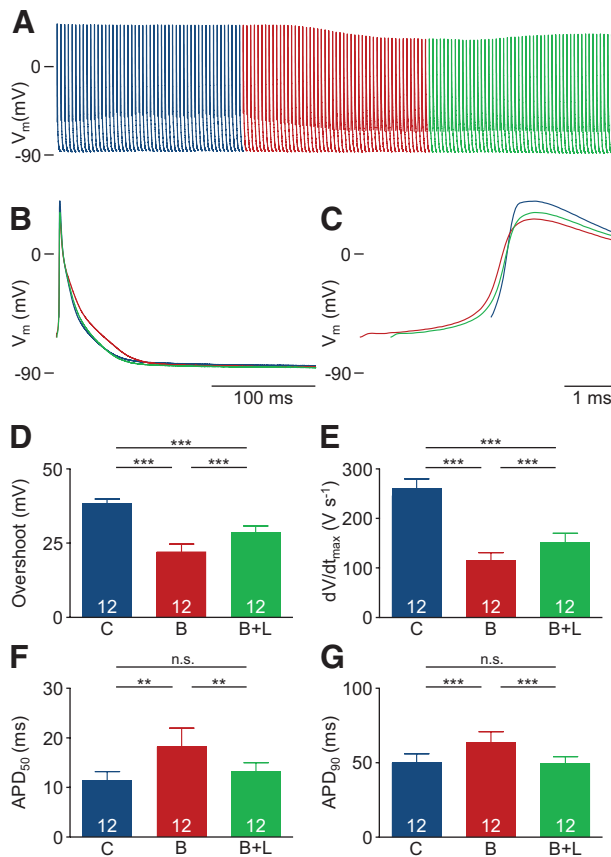

**Fig. 1.** Lipid rescue of the epicardial action potential (AP): bupivacaine. (A) A representative train of 150 APs recorded in a left ventricular epicardial cardiomyocyte at 1 Hz under control conditions (blue), with 10  $\mu$ M bupivacaine (red), and with 10  $\mu$ M bupivacaine and 10% Lipovenös® (green). (B) The last APs recorded under each condition are superimposed. (C) The upstroke of the APs shown in B. (D) Mean overshoot of the AP. (E) Maximal upstroke velocity ( $dV/dt_{max}$ ) of the AP. (F) AP duration at 50% repolarization ( $APD_{50}$ ). (G) AP duration at 90% repolarization ( $APD_{90}$ ). The numbers in the bars give the number of myocytes investigated. Data are given as mean  $\pm$  SEM. \*\* $P < 0.01$ . \*\*\* $P < 0.001$ . B = 10  $\mu$ M bupivacaine; B+L = 10  $\mu$ M bupivacaine + 10% Lipovenös®; C = control;  $dV/dt_{max}$  = maximal upstroke velocity of the AP; Lipovenös® = Lipovenös® MCT 20% (Fresenius Kabi AG, Bad Homburg, Germany); n.s. = not significant; overshoot = overshoot of the AP;  $V_m$  = membrane potential.

( $46.8 \pm 4.5$  ms,  $n = 10$  vs.  $43.8 \pm 4.3$  ms,  $n = 10$ ;  $P < 0.05$ ) and tended to shorten the endocardial  $APD_{90}$  ( $87.5 \pm 15.4$  ms,  $n = 5$  vs.  $105.9 \pm 23.1$  ms,  $n = 5$ , not significant). Resting membrane potential, maximal upstroke velocity, and overshoot were not significantly altered (not shown).

The results on the upstroke velocity and overshoot of the AP demonstrate that Lipovenös® reversed the block of cardiac  $I_{Na}$  induced by bupivacaine but not or to a substantially lesser degree by mepivacaine. The AP prolongation induced by bupivacaine is consistent with an additional block of repolarizing  $K^+$  currents by this LA<sup>25</sup> which was also reversed by Lipovenös®. To further characterize the effect of lipid

rescue therapy on the level of ionic currents, we decided to focus on  $I_{Na}$  because it is the primary target of LAs in the heart. Moreover, we will also detail some findings on heterologously expressed repolarizing  $K^+$  channels.

### Lipid Rescue Reverses the Inhibition of $I_{Na}$ by Bupivacaine

Figure 3, A and B, depicts representative  $Na^+$  currents from left ventricular cardiomyocyte, and figure 3C depicts average normalized  $I_{Na}$  amplitudes. The inset of figure 3A shows the pulse protocol. Bupivacaine at 10  $\mu$ M reduced  $I_{Na}$  by 54% ( $-19.3 \pm 1.9$  pApF<sup>-1</sup> vs.  $-42.3 \pm 4.3$  pApF<sup>-1</sup>;  $n = 17$ ;  $P < 0.001$ ). Lipovenös® of 10% increased  $I_{Na}$  by 37% in the presence of bupivacaine ( $-26.4 \pm 2.8$  pApF<sup>-1</sup>;  $n = 17$ ;  $P < 0.001$ ). Washout with control solution returned  $I_{Na}$  to control values.

A “lipid sink,” *i.e.*, the reduction in the free LA concentration by absorption of the LA by the lipid, has been proposed as a possible mechanism of lipid rescue therapy.<sup>28</sup> To directly assess the contribution of the lipid sink, we removed the lipid phase from the solution containing both 10  $\mu$ M bupivacaine and 10% Lipovenös® by ultracentrifugation. If a lipid sink contributes to the effects of Lipovenös®, the water phase of the centrifuged solution should, due to the reduced bupivacaine concentration, have a similar effect as the whole solution. Figure 3, D–F, illustrates the effects of the water phase:  $I_{Na}$  was increased by 17% ( $-27.3 \pm 2.0$  pApF<sup>-1</sup> vs.  $-23.0 \pm 1.7$  pApF<sup>-1</sup>;  $n = 17$ ;  $P < 0.001$ , control:  $-50.1 \pm 4.0$  pApF<sup>-1</sup>), demonstrating the contribution of the lipid-sink effect. However, the total effect of Lipovenös® seems to be larger than the effect of the water phase alone, indicating that part of the effect is dependent on the presence of the lipid (“direct lipid effect”).

According to the lipid-sink hypothesis, the effect of Lipovenös® on the mepivacaine-induced block should be markedly smaller than in the case of bupivacaine. Lipovenös® increased  $I_{Na}$  blocked by 40  $\mu$ M mepivacaine by 17% ( $-35.1 \pm 3.9$  pApF<sup>-1</sup> vs.  $-30.0 \pm 3.5$  pApF<sup>-1</sup>;  $n = 24$ ;  $P < 0.001$ , control:  $-44.3 \pm 5.4$  pApF<sup>-1</sup>, fig. 4, A–C). Surprisingly, also the water phase of the solution containing Lipovenös® and mepivacaine increased  $I_{Na}$  by 8% ( $-37.9 \pm 3.6$  pApF<sup>-1</sup> vs.  $-35.1 \pm 3.2$  pApF<sup>-1</sup>;  $n = 23$ ;  $P < 0.01$ , control:  $-48.2 \pm 4.4$  pApF<sup>-1</sup>) compared with mepivacaine alone (fig. 4, D–F).

The total effect of Lipovenös® on the LA blocked  $I_{Na}$  was significantly ( $P < 0.05$ ) larger for bupivacaine than for mepivacaine (fig. 5A). As expected from the higher degree of lipophilicity of bupivacaine, this was due to a significantly ( $P < 0.01$ ) higher lipid-sink effect (fig. 5B), whereas the direct lipid effect was similar for both LAs (fig. 5C). For this comparison, the direct lipid effect was assessed by dividing the effect of the complete Lipovenös® solution in each experiment by the mean effect of the water phase and normalized to the first pulse after perfusion with the Lipovenös® solution. Consistent with a direct lipid effect, Lipovenös® also significantly ( $P < 0.01$ ) increased  $I_{Na}$  in the absence of LA (fig. 5D).

**Table 1.** Lipid Rescue of the Action Potential: Bupivacaine

|                             |             | Control          | 10 $\mu$ M Bupivacaine | 10 $\mu$ M Bupivacaine + 10% Lipovenös®     |
|-----------------------------|-------------|------------------|------------------------|---------------------------------------------|
| $V_m$ (mV)                  | Epicardial  | $-87.8 \pm 0.7$  | $-88.3 \pm 0.6^*$      | $-88.2 \pm 0.6^*$                           |
|                             | Endocardial | $-86.4 \pm 0.8$  | $-86.8 \pm 0.9$        | $-87.1 \pm 0.7$                             |
| Overshoot (mV)              | Epicardial  | $38.1 \pm 1.6$   | $21.8 \pm 2.8^{***}$   | $28.5 \pm 2.1^{***\dagger\dagger\dagger}$   |
|                             | Endocardial | $41.2 \pm 2.5$   | $26.6 \pm 5.3^{***}$   | $33.6 \pm 3.8^{***\dagger\dagger}$          |
| $dV/dt_{max}$ ( $Vs^{-1}$ ) | Epicardial  | $258.9 \pm 19.7$ | $114.9 \pm 15.0^{***}$ | $150.4 \pm 18.5^{***\dagger\dagger\dagger}$ |
|                             | Endocardial | $278.1 \pm 47.9$ | $141.9 \pm 34.2^{***}$ | $181.1 \pm 38.9^{***\dagger\dagger}$        |
| $APD_{0\text{ mV}}$ (ms)    | Epicardial  | $4.5 \pm 0.6$    | $5.4 \pm 1.3$          | $4.8 \pm 0.8$                               |
|                             | Endocardial | $25.3 \pm 6.7$   | $28.2 \pm 8.2$         | $20.3 \pm 4.7\dagger$                       |
| $APD_{20}$ (ms)             | Epicardial  | $2.7 \pm 0.2$    | $6.1 \pm 1.7^*$        | $3.4 \pm 0.3\dagger$                        |
|                             | Endocardial | $7.6 \pm 1.3$    | $20.3 \pm 3.6^{***}$   | $10.8 \pm 1.7\dagger\dagger\dagger$         |
| $APD_{50}$ (ms)             | Epicardial  | $11.3 \pm 1.9$   | $18.2 \pm 3.8^{**}$    | $13.1 \pm 1.9\dagger\dagger$                |
|                             | Endocardial | $48.3 \pm 11.9$  | $61.3 \pm 12.7^*$      | $40.5 \pm 7.6\dagger\dagger$                |
| $APD_{90}$ (ms)             | Epicardial  | $50.0 \pm 6.1$   | $63.6 \pm 7.3^{***}$   | $49.6 \pm 4.5\dagger\dagger\dagger$         |
|                             | Endocardial | $119.4 \pm 21.3$ | $132.0 \pm 20.9$       | $93.6 \pm 13.1^{***\dagger\dagger\dagger}$  |
| n                           | Epicardial  | 12               | 12                     | 12                                          |
|                             | Endocardial | 7                | 7                      | 7                                           |

Data are given as mean  $\pm$  SEM.

\* $P < 0.05$ . \*\* $P < 0.01$ . \*\*\* $P < 0.001$  vs. control.  $\dagger P < 0.05$ .  $\dagger\dagger P < 0.01$ .  $\dagger\dagger\dagger P < 0.001$  vs. 10  $\mu$ M bupivacaine.

$APD_{0\text{ mV}}$  = action potential duration at 0 mV;  $APD_{20}$  = action potential duration at 20% repolarization;  $APD_{50}$  = action potential duration at 50% repolarization;  $APD_{90}$  = action potential duration at 90% repolarization;  $dV/dt_{max}$  = maximal upstroke velocity of the action potential; Lipovenös® = Lipovenös® MCT 20% (Fresenius Kabi AG, Bad Homburg, Germany); n = number of myocytes investigated; overshoot = overshoot of the action potential;  $V_m$  = resting membrane potential.

To estimate the bupivacaine concentration in the water phase of the centrifuged solution, the relative increase in  $I_{Na}$  was plotted to a concentration–response curve obtained for the relevant range of concentrations (fig. 5E). Interpolation using a Hill function indicated that the increase in the blocked  $I_{Na}$  by the lipid-sink effect corresponded to a reduction in the bupivacaine concentration in the water phase to approximately 5.9  $\mu$ M. Notably, the total increase in the blocked  $I_{Na}$  after the application of bupivacaine + Lipovenös® (total lipid effect) was as large as if the bupivacaine concentration had been reduced to approximately 3.9  $\mu$ M.

### Lipid Rescue Reverses the Inhibition of hKv4.2 + hKChIP2b Currents by Bupivacaine

To investigate whether lipid rescue of ionic currents is a general mechanism, additional experiments on hKv4.2 + hKChIP2b currents in *X. laevis* oocytes were performed, thereby investigating the lipid effect on a different ion channel in a different experimental system. Kv4.2 and the  $\beta$  subunit KChIP2 are ion channel subunits that underlie the repolarizing transient outward  $K^+$  current ( $I_{to}$ ) in cardiomyocytes. Figure 6, A and B, depicts representative hKv4.2 + hKChIP2b currents measured at +40 mV from an oocyte exposed to 0, 100, and 300  $\mu$ M concentrations of bupivacaine (fig. 6A) and to the same concentrations of bupivacaine in the presence of 10% Lipovenös® (fig. 6B). The lipid emulsion significantly increased the  $IC_{50}$  of bupivacaine (calculated from the charge at +40 mV) from  $126.6 \pm 17.9$   $\mu$ M (n = 14) to  $218.2 \pm 29.4$   $\mu$ M (n = 15;  $P < 0.05$ ; fig. 6C). The hillslope was unaffected ( $1.1 \pm 0.1$ , n = 14 vs.  $1.3 \pm 0.1$ , n = 15, n.s.). The  $IC_{50}$  for

mepivacaine was considerably higher ( $1,688 \pm 235$   $\mu$ M, n = 13) and tended to be lower rather than higher in the presence of the lipid ( $1,203 \pm 146$   $\mu$ M, n = 19;  $P = 0.07$ ; fig. 6D). Also for mepivacaine, the hillslope was unaffected ( $1.0 \pm 0.0$ , n = 13 vs.  $0.9 \pm 0.0$ , n.s., n = 19).

In a separate series of experiments, using a highly concentrated stock of the bath solution, we were able to record the concentration–response of hKv4.2 + hKChIP2b currents blocked by 300  $\mu$ M bupivacaine to increased Lipovenös® concentrations. The relative charge increased quite linearly up to 40% of Lipovenös® concentration and was nearly twice as high at 80% lipid emulsion as at 10% ( $82.5 \pm 1.2\%$  vs.  $42.9 \pm 2.3\%$ , n = 13;  $P < 0.001$ ; fig. 6E).

The contribution of a lipid-sink mechanism was also evaluated in this series of experiments (fig. 6F); after ultracentrifugation, the water phase of the lipid and 100  $\mu$ M bupivacaine-containing solution was as effective as the whole mixture in reversing the bupivacaine-induced block (whole solution:  $+34.4 \pm 3.9\%$ , n = 10,  $P < 0.001$ ; water phase:  $+39.2 \pm 3.6\%$ , n = 10;  $P < 0.001$ ; effect whole solution vs. effect water phase: n.s.). Together with the mepivacaine data, this indicates that at 10%, Lipovenös® did not exert a direct lipid effect on hKv4.2 + KChIP2b channels.

### A Part of the Effect of Lipid Rescue Can Be Attributed to a “Lipid-sink” Mechanism

The data presented indicate the presence of a lipid-sink effect. To directly assess this effect, LA concentrations were measured by gas chromatography followed by mass spectrometry (table 3). After ultracentrifugation of the solution

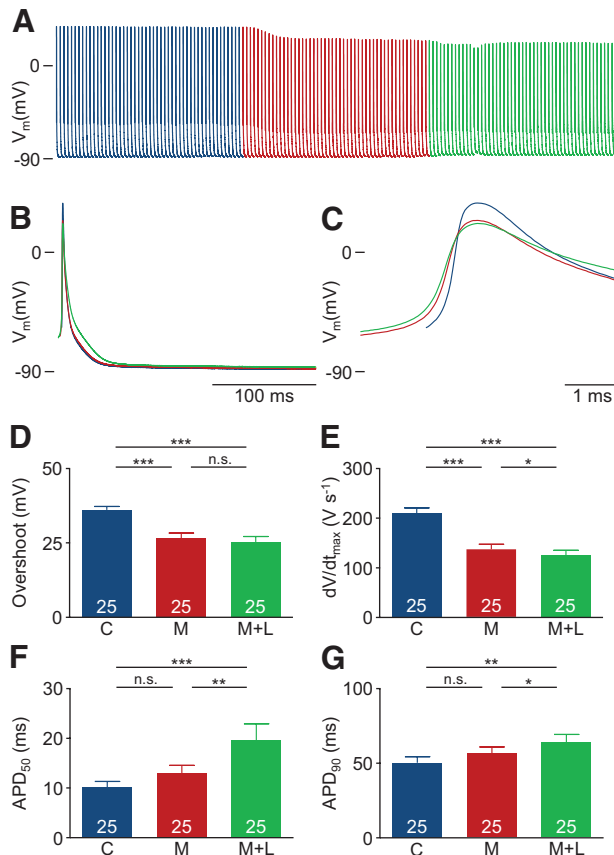

**Fig. 2.** Lipid rescue of the epicardial action potential (AP): mepivacaine. (A) A representative train of 150 APs recorded in a left ventricular epicardial cardiomyocyte at 1 Hz under control conditions (blue), with 40  $\mu$ M mepivacaine (red), and with 40  $\mu$ M mepivacaine and 10% Lipovenös® (green). (B) The last APs under each condition are superimposed. (C) The upstroke of the APs shown in B. (D) Mean overshoot of the AP. (E) Maximal upstroke velocity ( $dV/dt_{max}$ ) of the AP. (F) AP duration at 50% repolarization ( $APD_{50}$ ). (G) AP duration at 90% repolarization ( $APD_{90}$ ). The numbers in the bars give the number of myocytes investigated. Data are given as mean  $\pm$  SEM. \* $P < 0.05$ . \*\* $P < 0.01$ . \*\*\* $P < 0.001$ . C = control;  $dV/dt_{max}$  = maximal upstroke velocity of the AP; Lipovenös® = Lipovenös® MCT 20% (Fresenius Kabi AG, Bad Homburg, Germany); M = 40  $\mu$ M mepivacaine; M+L = 40  $\mu$ M mepivacaine + 10% Lipovenös®; n.s. = not significant; overshoot = overshoot of the AP;  $V_m$  = membrane potential.

containing bupivacaine and 10% Lipovenös®, the concentration of bupivacaine (original concentration: 10  $\mu$ M and 100  $\mu$ M) was significantly reduced in the water phase by approximately 30% ( $P < 0.001$ ; table 3), demonstrating the lipid-sink effect. The concentration of bupivacaine in the water phase was remarkably close to the concentration estimated by concentration–response analysis. Concomitantly, the concentration in the lipid-enriched phase was increased. Also for mepivacaine, we noted a small decrease in the concentration in the water phase, which was significant for 10  $\mu$ M only. The decrease in LA concentration was larger for bupivacaine than for mepivacaine (at 10  $\mu$ M:  $P = 0.05$  and at

100  $\mu$ M:  $P < 0.001$ ). These data confirm our interpretation of the electrophysiological experiments.

## Discussion

We demonstrate lipid rescue of the cardiac AP and  $I_{Na}$  after intoxicating cardiomyocytes with bupivacaine. Lipid rescue did not reverse the effects of mepivacaine on the AP, although it increased  $I_{Na}$ . Part of the lipid effect was attributable to a lipid-sink mechanism. Lipid rescue was also effective on hKv4.2 + KChIP2b currents in *X. laevis* oocytes resulting in a rightward shift of the concentration–response curve for bupivacaine, but not for mepivacaine.

### Effects of the LA on AP Upstroke and $I_{Na}$

Local anesthetics block inactivated  $Na^+$  channels;<sup>24,29</sup> therefore, the block exhibits use-dependence and depends on the membrane potential.<sup>1,30</sup> We concentrated on the clinically relevant use-dependent block using APs and a voltage protocol mimicking the physiological resting membrane potential and AP shape of the cardiomyocyte. The effects of bupivacaine on AP upstroke and  $I_{Na}$  are in good agreement with previous findings where the  $IC_{50}$  of bupivacaine for cardiac  $Na^+$  currents was between 3 and 8.6  $\mu$ M, depending on model and enantiomer.<sup>24,29,31</sup> For mepivacaine, only limited information on cardiac  $I_{Na}$  is available.<sup>1</sup> In a study conducted on closely related<sup>32</sup> tetrodotoxin-resistant neuronal  $Na^+$  currents,<sup>33</sup> the  $IC_{50}$  of use-dependent block was 13–15  $\mu$ M for bupivacaine and 70–90  $\mu$ M for mepivacaine.

### Effects of the LA on Repolarization

The APD prolongation by bupivacaine indicates a block of repolarizing  $K^+$  channels. Cardiac repolarization in rat is achieved by the transient outward  $K^+$  current ( $I_{to}$ ), slowly or noninactivating currents, and the inward-rectifying  $K^+$  current  $I_{K1}$ .<sup>27</sup> For  $I_{to}$  charge block, Castle<sup>25</sup> reported an  $IC_{50}$  of 23  $\mu$ M for bupivacaine and 790  $\mu$ M for mepivacaine.  $I_{K1}$  was not affected by bupivacaine and blocked approximately 50% by 3 mM of mepivacaine. These data explain why bupivacaine but not mepivacaine prolonged APD in our study. Our  $IC_{50}$  for hKv4.2 + KChIP2b channels expressed in *X. laevis* oocytes is somewhat higher than that reported for  $I_{to}$ .<sup>25</sup> This is consistent with findings from our group showing greater  $IC_{50}$  values for the aminoquinolines primaquine and chloroquine in oocytes expressing hKv4.2 + hKChIP2b compared with native  $I_{to}$ .<sup>34</sup>

### Effects of Lipid Rescue on Cellular Electrophysiology

We examined the effects of a clinically used lipid emulsion on single cardiomyocytes at a concentration that can be reached in lipid resuscitation in patients.<sup>16</sup> Bupivacaine concentrations and the experimental design were chosen to replay the situation in the patient and to provide insight into the underlying mechanisms. Experiments, in which the lipid phase of the solution containing Lipovenös® and bupivacaine



**Table 2.** Lipid Rescue of the Action Potential: Mepivacaine

|                              |             | Control          | 40 $\mu$ M Mepivacaine | 40 $\mu$ M Mepivacaine<br>+ 10% Lipovenös® |
|------------------------------|-------------|------------------|------------------------|--------------------------------------------|
| $V_m$ (mV)                   | Epicardial  | $-87.9 \pm 0.5$  | $-88.1 \pm 0.4$        | $-87.6 \pm 0.4^{*††}$                      |
|                              | Endocardial | $-88.2 \pm 0.4$  | $-88.4 \pm 0.4$        | $-88.0 \pm 0.4^†$                          |
| Overshoot (mV)               | Epicardial  | $35.9 \pm 1.1$   | $26.3 \pm 1.8^{***}$   | $25.1 \pm 1.9^{***}$                       |
|                              | Endocardial | $41.5 \pm 0.7$   | $35.6 \pm 1.2^{***}$   | $35.6 \pm 1.2^{***}$                       |
| $dV/dt_{max}$ ( $V s^{-1}$ ) | Epicardial  | $208.8 \pm 10.5$ | $136.1 \pm 10.0^{***}$ | $124.1 \pm 9.6^{***†}$                     |
|                              | Endocardial | $294.5 \pm 10.9$ | $198.8 \pm 10.0^{***}$ | $191.6 \pm 9.9^{***}$                      |
| $APD_{0mV}$ (ms)             | Epicardial  | $3.4 \pm 0.2$    | $3.3 \pm 0.2$          | $3.9 \pm 0.3^{***†††}$                     |
|                              | Endocardial | $28.4 \pm 5.6$   | $28.4 \pm 5.5$         | $23.2 \pm 4.4^{††}$                        |
| $APD_{20}$ (ms)              | Epicardial  | $2.3 \pm 0.1$    | $3.0 \pm 0.2$          | $4.1 \pm 0.5^{***††}$                      |
|                              | Endocardial | $10.0 \pm 2.5$   | $15.1 \pm 3.7^{***}$   | $12.0 \pm 2.5^†$                           |
| $APD_{50}$ (ms)              | Epicardial  | $10.1 \pm 1.1$   | $13.0 \pm 1.5$         | $19.5 \pm 3.3^{***††}$                     |
|                              | Endocardial | $56.9 \pm 9.7$   | $59.7 \pm 9.9$         | $48.7 \pm 8.5^{***†††}$                    |
| $APD_{90}$ (ms)              | Epicardial  | $50.0 \pm 4.1$   | $56.2 \pm 4.5$         | $63.5 \pm 5.5^{**†}$                       |
|                              | Endocardial | $125.2 \pm 15.4$ | $125.2 \pm 14.9$       | $102.2 \pm 13.1^{***†††}$                  |
| n                            | Epicardial  | 25               | 25                     | 25                                         |
|                              | Endocardial | 34               | 34                     | 34                                         |

Data are given as mean  $\pm$  SEM.

\* $P < 0.05$ . \*\* $P < 0.01$ . \*\*\* $P < 0.001$  vs. control.  $^†P < 0.05$ .  $^††P < 0.01$ .  $^†††P < 0.001$  vs. 10  $\mu$ M bupivacaine.

$APD_{0mV}$  = action potential duration at 0 mV;  $APD_{20}$  = action potential duration at 20% repolarization;  $APD_{50}$  = action potential duration at 50% repolarization;  $APD_{90}$  = action potential duration at 90% repolarization;  $dV/dt_{max}$  = maximal upstroke velocity of the action potential; Lipovenös® = Lipovenös® MCT 20% (Fresenius Kabi AG, Bad Homburg, Germany); n = number of myocytes investigated; overshoot = overshoot of the action potential;  $V_m$  = resting membrane potential.

was removed by ultracentrifugation, indicated that a part of the effect of Lipovenös® on AP and  $I_{Na}$  was independent of the presence of the lipid. This is an experimental evidence for the contribution of a lipid-sink effect to the effects of Lipovenös® in our model. However, another part of the effect was dependent on the presence of the lipid. This effect was also present in the absence of the LA and was largely responsible for lipid rescue of  $I_{Na}$  after block by mepivacaine. We could not demonstrate lipid rescue from mepivacaine of the AP. This was probably due to a combination of the small-sized effect on  $I_{Na}$  together with a slight depolarization of the resting membrane potential by the lipid emulsion which likely led to an increased inactivation of the  $Na^+$  channels, sensitizing  $I_{Na}$  for mepivacaine. This depolarization was not present in the AP experiments with bupivacaine.

Lipid rescue was also assessed for hKv4.2 + KChIP2b channels. Concentration–response experiments demonstrated an increased  $IC_{50}$  of bupivacaine but not of mepivacaine in the presence of the lipid emulsion. Moreover, we also demonstrated a concentration dependence of the effect of the lipid emulsion. At 10%, the lipid itself did not influence the Kv currents.

### Limitations of the Patch Clamp Technique

The cardiac  $I_{Na}$  is a large current with rapid activation and inactivation kinetics, potentially driving the whole cell patch clamp technique to its limits. To minimize voltage errors, we lowered the extracellular  $Na^+$  concentration to reduce  $I_{Na}$  and used low-resistance pipettes and  $R_s$  compensation to reduce the effective  $R_s$ . This resulted in an average time constant of 120  $\mu s$  for the capacitive artifact and an

average voltage error between 5.5 (control conditions) and 2.5 mV (bupivacaine block). This voltage error was small but nonetheless different between the control and blocked conditions and could possibly affect our results. To assess its consequences, we evaluated the degree of block induced by bupivacaine and mepivacaine separately for the 25% of cells with the largest control currents (median bupivacaine:  $-8.2$  nA, mepivacaine:  $-8.9$  nA) and the 25% with the smallest control currents (median bupivacaine:  $-3.1$  nA, mepivacaine:  $-2.4$  nA). Block was similar in these groups both for bupivacaine (large  $I_{Na}$ :  $55 \pm 1\%$ ,  $n = 10$ , small  $I_{Na}$ :  $53 \pm 2\%$ ,  $n = 11$ , n.s.) and for mepivacaine (large  $I_{Na}$ :  $30 \pm 2\%$ ,  $n = 11$ , small  $I_{Na}$ :  $28 \pm 2\%$ ,  $n = 12$ , n.s.). Moreover, our data on  $I_{Na}$  correlate well with the AP upstroke velocity, which is largely unaffected by  $R_s$ . Taken together, a distortion of our results by the voltage error is unlikely.

### Clinical Implications

Lipid resuscitation has been effectively used to treat intoxications with lipophilic LAs and other lipophilic drugs. Moreover, there are reports in which lipid rescue has also successfully been used in intoxications with less lipophilic drugs such as mepivacaine.<sup>15</sup> In the current study, the effectiveness of lipid rescue of the cardiac AP correlated with the lipophilicity of the LA, and we could demonstrate that a large part of this effect was due to a lipid-sink mechanism. However, the slight reversal of the mepivacaine-induced block of  $I_{Na}$  might provide encouragement to further investigate lipid rescue of less lipophilic compounds also.

Recently, the contribution of ion channel block to cardiac LA toxicity and the clinical importance of the lipid-sink



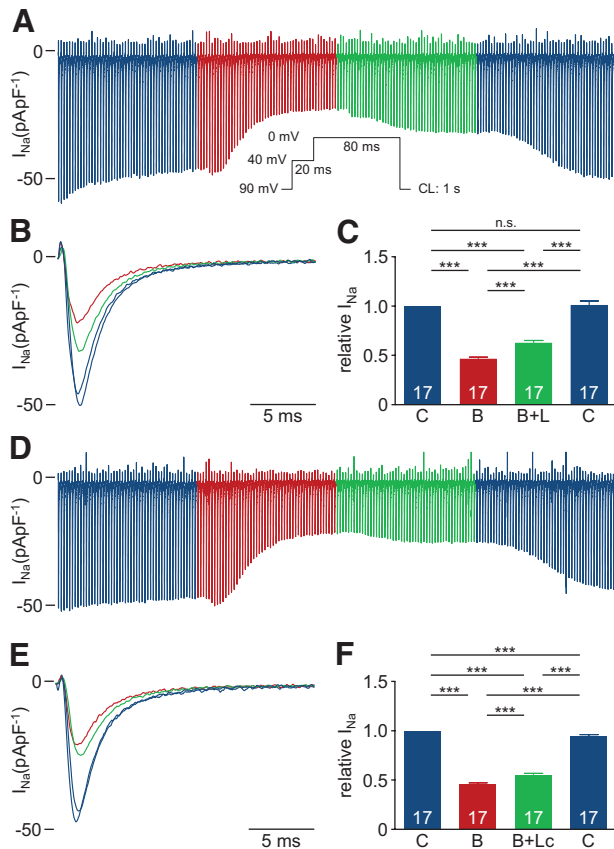

**Fig. 3.** Lipid rescue of  $I_{Na}$ : bupivacaine. (A) A representative train of 200  $Na^+$  currents obtained from a left ventricular cardiomyocyte at 1 Hz under control conditions (blue), with 10  $\mu$ M bupivacaine (red), and with 10  $\mu$ M bupivacaine and 10% Lipovenös® (green).  $I_{Na}$  was elicited by a 20 ms voltage step from  $-90$  to  $-40$  mV followed by a 80 ms step to 0 mV to simulate the effects of the action potential on  $Na^+$  channel block (see inset). Cycle length was 1 s. (B) The last  $I_{Na}$  under each condition superimposed. (C) Average normalized  $I_{Na}$  under each condition. (D–F)  $I_{Na}$  recorded under similar conditions as before; however, the lipid phase was removed from the bupivacaine–lipid mixture by ultracentrifugation to demonstrate the lipid-sink effect. The numbers in the bars give the number of myocytes investigated. Data are given as mean  $\pm$  SEM. \*\*\* $P$  < 0.001. B = 10  $\mu$ M bupivacaine; B+L = 10  $\mu$ M bupivacaine + 10% Lipovenös®; B+Lc = the water phase of 10  $\mu$ M bupivacaine + 10% Lipovenös® after ultracentrifugation; C = control; CL = cycle length;  $I_{Na}$  = cardiac fast  $Na^+$  current; Lipovenös® = Lipovenös® MCT 20% (Fresenius Kabi AG, Bad Homburg, Germany); n.s. = not significant.

effect have been questioned, and alternative explanations have been proposed.<sup>28</sup> In this context, it is helpful consider the specific models and symptoms examined. In most experimental studies, bupivacaine was applied at a dose that resulted in asystole. However, many case reports imply that arrhythmias, including bradycardia, supraventricular, and ventricular tachycardia, are more common in the clinical situation than primary asystole.<sup>15</sup> In the electrocardiogram, the typical early sign of bupivacaine intoxication is

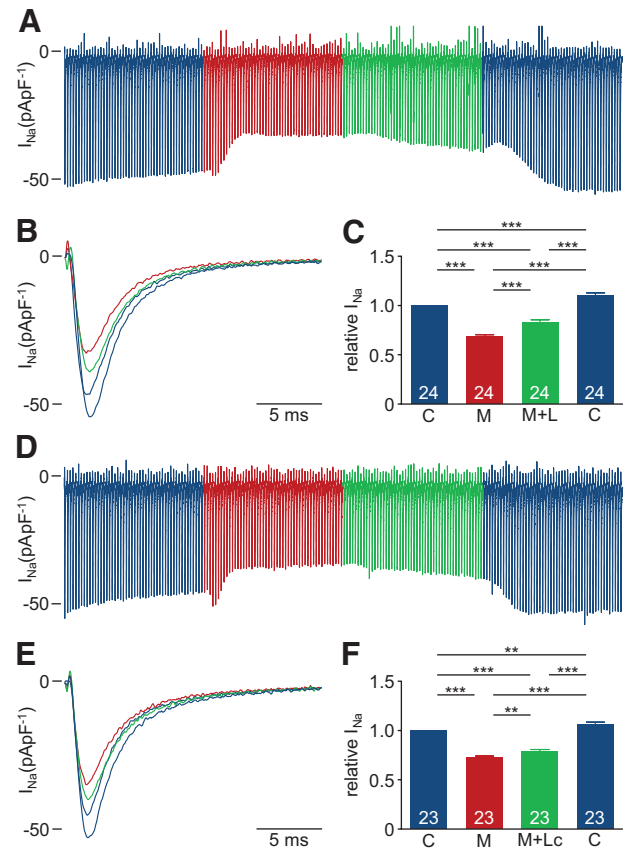

**Fig. 4.** Lipid rescue of  $I_{Na}$ : mepivacaine. (A) A representative train of 200  $Na^+$  currents obtained from a left ventricular cardiomyocyte at 1 Hz under control conditions (blue), with 40  $\mu$ M mepivacaine (red), and with 40  $\mu$ M mepivacaine and 10% Lipovenös® (green). (B) The last  $I_{Na}$  under each condition superimposed. (C) Average normalized  $I_{Na}$  under each condition. (D–F)  $I_{Na}$  recorded under similar conditions as before; however, the lipid phase was removed from the mepivacaine–lipid mixture by ultracentrifugation to demonstrate the lipid-sink effect. The numbers in the bars give the number of myocytes investigated. Data are given as mean  $\pm$  SEM. \*\* $P$  < 0.01. \*\*\* $P$  < 0.001. C = control;  $I_{Na}$  = cardiac fast  $Na^+$  current; Lipovenös® = Lipovenös® MCT 20% (Fresenius Kabi AG, Bad Homburg, Germany); M = 40  $\mu$ M mepivacaine; M+L = 40  $\mu$ M mepivacaine + 10% Lipovenös®; M+Lc = the water phase of 40  $\mu$ M mepivacaine + 10% Lipovenös® after ultracentrifugation; n.s. = not significant.

broadening and deformation of the QRS complex, indicating a delayed conduction of cardiac excitation consistent with  $Na^+$  channel block.<sup>35–37</sup> The QTc time is mildly prolonged<sup>36,37</sup> due to  $K^+$  channel block.<sup>2,26,38–41</sup> The main reason for ventricular tachycardia and consecutive ventricular fibrillation in these patients is likely a slowing of cardiac conduction by  $Na^+$  channel block.<sup>2</sup> At higher concentrations, bupivacaine additionally induces a reduction of contractility and asystole, attributable to complete  $Na^+$  channel block and interference with pacemaking,  $Ca^{2+}$  handling, and mitochondrial function.<sup>1,2</sup> Consequently, the partial reversal of the bupivacaine effects on  $I_{Na}$  and the

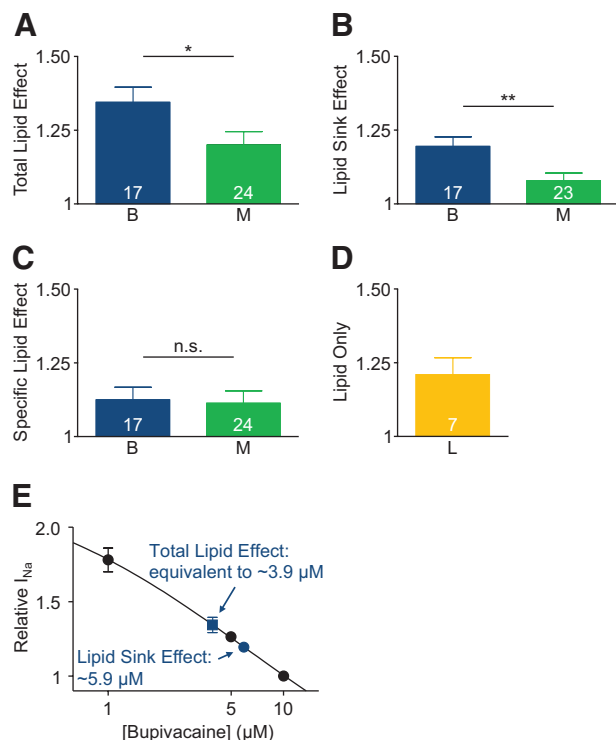

**Fig. 5.** Dissection of the mechanism of lipid rescue: evidence for a lipid-sink effect. (A) Average total effect of Lipovenös® on  $I_{Na}$  blocked by bupivacaine and mepivacaine. (B) Average lipid-sink effect of Lipovenös® on  $I_{Na}$  blocked by bupivacaine and mepivacaine. The lipid-sink effect is the effect of the centrifuged mixture of lipid and LA. (C) The part of the effect of Lipovenös® that cannot be attributed to the lipid-sink effect. (D) Effect of Lipovenös® on  $I_{Na}$ . (E) Concentration-response analysis (black circles) of  $I_{Na}$  normalized to  $I_{Na}$  measured at 10 μM bupivacaine ( $n = 7$ ) used to estimate the effective bupivacaine concentration in the water phase of the centrifuged bupivacaine + Lipovenös® (blue circle, lipid-sink effect, data from B). The blue box indicates the seemingly larger reduction of the bupivacaine concentration caused by the total lipid effect (data from A). Please note the logarithmic scaling of the x-axis. The numbers in the bars give the number of myocytes investigated. Data are given as mean  $\pm$  SEM. \*  $P < 0.05$ . \*\*  $P < 0.01$ . B = 10 μM bupivacaine;  $I_{Na}$  = cardiac fast  $Na^+$  current; L = 10% Lipovenös® (Lipovenös® MCT 20%; Fresenius Kabi AG, Bad Homburg, Germany) only; M = 40 μM mepivacaine;  $n$  = number of myocytes investigated; n.s. = not significant.

AP may well contribute the clinical effectiveness of lipid resuscitation.

We present evidence for a dual mode of action of the lipid emulsion, the lipid-sink effect and a direct lipid effect. The lipid-sink effect will be most important at plasma concentrations of near  $IC_{50}$  (i.e., at the concentrations used in the current study), where the concentration-response relation is steepest. In fact, plasma concentrations of approximately 10 μM of bupivacaine have been reported in successful lipid resuscitation.<sup>16</sup> The direct lipid effect is unlikely to depend on the bupivacaine concentration because it is also present in the absence of LA. Considering

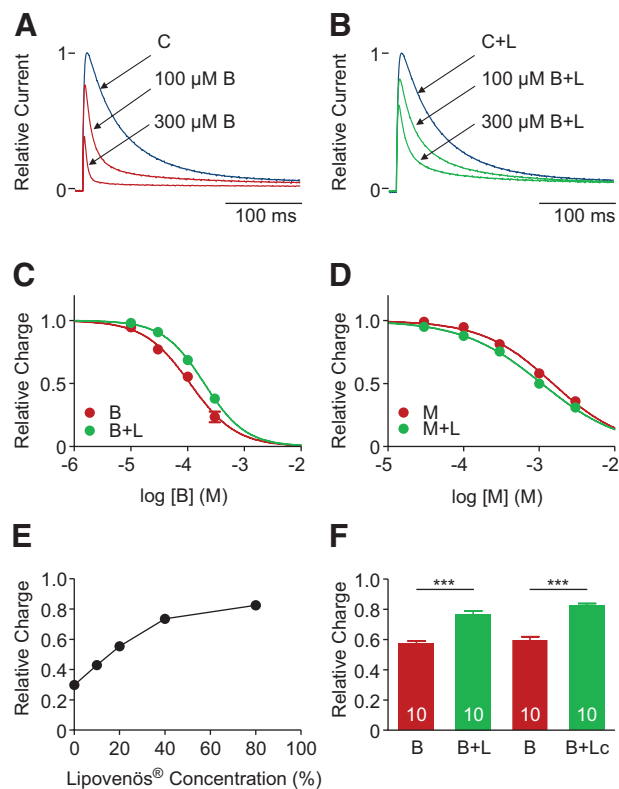

**Fig. 6.** Lipid rescue of Kv4.2 + KChIP2b currents in *Xenopus laevis* oocytes. (A) Kv4.2 + KChIP2b currents elicited at +40 mV under control conditions (blue) and with 100 μM and 300 μM bupivacaine in the bath (red). (B) Kv4.2 + KChIP2b currents elicited at +40 mV under control conditions (blue) and with 100 μM and 300 μM bupivacaine plus 10% Lipovenös® in the bath (green). (C and D) Concentration-response curves for bupivacaine (C) and mepivacaine (D) under control conditions (red) and with 10% Lipovenös® in the bath (green). (E) Concentration dependence of the effect of Lipovenös® on the block of Kv4.2 + KChIP2b currents by 300 μM bupivacaine ( $n = 13$ ). (F) Comparison of the effects of 10% Lipovenös® and of the water phase of the bupivacaine-lipid mixture on the block of Kv4.2 + KChIP currents by 100 μM bupivacaine. The numbers in the bars give the number of oocytes investigated. Data are given as mean  $\pm$  SEM. \*\*\*  $P < 0.001$ . B = 10 μM bupivacaine; B+L = 10 μM bupivacaine + 10% Lipovenös®; B+Lc = the water phase of 10 μM bupivacaine + 10% Lipovenös® after ultracentrifugation; C = control; C+L = control + 10% Lipovenös®; Lipovenös® = Lipovenös® MCT 20% (Fresenius Kabi AG, Bad Homburg, Germany); M = 40 μM mepivacaine; M+L = 40 μM mepivacaine + 10% Lipovenös®; M+Lc = the water phase of 40 μM mepivacaine + 10% Lipovenös® after ultracentrifugation;  $n$  = number of myocytes investigated; n.s. = not significant.

the physiology of the microcirculation, both effects may act sequentially; the lipid emulsion consists of artificial chylomicrons of approximately 500 nM diameter,<sup>42</sup> which cannot easily leave the blood vessels (pore size approximately <30 nM),<sup>43,44</sup> and are broken down by lipoprotein lipase to free fatty acids which then leave the capillary by

**Table 3.** LA Concentrations

|                  | LA        | LA<br>+ 10% Lipovenös® | LA<br>+ 10% Lipovenös®<br>Water Phase | LA<br>+ 10% Lipovenös®<br>Lipid-enriched Phase |
|------------------|-----------|------------------------|---------------------------------------|------------------------------------------------|
| Bupivacaine (μM) |           |                        |                                       |                                                |
| 10 μM            |           | 8.8±0.3                | 6.5±0.2***                            | 45.4±5.0                                       |
| n                |           | 6                      | 6                                     | 6                                              |
| 100 μM           | 91.8±1.0  | 93.7±1.2               | 64.7±3.0***                           | 445.2±54.5                                     |
| n                | 7         | 7                      | 7                                     | 7                                              |
| Mepivacaine (μM) |           |                        |                                       |                                                |
| 10 μM            |           | 11.5±0.6               | 10.1±0.9*                             | 13.8±0.9                                       |
| n                |           | 6                      | 6                                     | 6                                              |
| 100 μM           | 102.8±1.0 | 105.8±3.2              | 103.9±3.5 (P = 0.08)                  | 115.9±3.0                                      |
| n                | 7         | 7                      | 7                                     | 7                                              |

Concentrations of LA dissolved in Tyrode solution and measured by gas chromatography–mass spectrometry. Because the lipid-enriched phase still contained a high amount of water, the concentrations for the lipid-enriched phase do not truly reflect the concentrations of the LA in the lipid itself. Data are given as mean ± SEM.

\*P < 0.05. \*\*\*P < 0.001 vs. LA + 10% Lipovenös®.

LA = local anesthetic; lipid-enriched phase = the lipid-enriched phase of the solution after ultracentrifugation; Lipovenös® = Lipovenös® MCT 20% (Fresenius Kabi AG, Bad Homburg, Germany); n = number of separate experiments; water phase = the water phase of the solution after ultracentrifugation.

diffusion.<sup>42,45</sup> The first action of lipid rescue *in vivo* may be a reduction of the free bupivacaine concentration in the plasma and consequently in the interstitial fluid (the lipid-sink effect), before a sufficient concentration of fatty acids reach the myocytes for an additional direct lipid effect. Here also a direct effect of fatty acids on bupivacaine binding by the Na<sup>+</sup> channel may be important.<sup>46</sup> Although the current data and results from others<sup>9,11,47</sup> give clear evidence for a lipid sink *in vitro* and *in vivo*, it has been difficult to demonstrate the lipid-sink effect in other experiments *in vivo* and in the clinical setting.<sup>48,49</sup> For example, Litonius *et al.*<sup>48</sup> observed a relevant reduction in the free bupivacaine concentration (from >20 μg/l to <13 μg/l) after lipid application in human, which was statistically not significant but nevertheless is consistent with a lipid-sink effect and warrants further examination. Our results exclude neither other beneficial effects of the lipid emulsion that improve metabolic function or contractility nor effects present only at the whole body level such as accelerated redistribution of the LA.<sup>28</sup>

Taken together, we demonstrate lipid rescue of cardiac electrophysiology from bupivacaine intoxication at the cellular level and identify a lipid-sink effect and a direct lipid effect as underlying mechanisms.

## Acknowledgments

The authors gratefully thank the expert technical assistance of Céline Grüniger, M.Sc., Jessica Rinke, and Ralf Rinke, M.Sc., all from the Institut für Zelluläre und Molekulare Physiologie, Friedrich-Alexander-Universität Erlangen-Nürnberg, Erlangen, Germany. The authors are indebted to Angelika Lampert, M.D., Ph.D., Institut für Physiologie und Pathophysiologie, Friedrich-Alexander-Universität Erlangen-Nürnberg, for help with designing the pulse protocols, and to Olaf Pongs, Ph.D., Zentrum für Molekulare Neurobiologie Hamburg, Hamburg, Ger-

many, for providing the plasmids coding for hKv4.2 and hKChIP2b.

Support was provided by Friedrich-Alexander-Universität Erlangen-Nürnberg, Erlangen, Germany; Universitätsklinikum Regensburg, Regensburg, Germany; and the Johannes und Frieda Marohn-Stiftung, Erlangen, Germany.

## Competing Interests

The authors declare no competing interests.

## Correspondence

Address correspondence to Dr. Wagner or Dr. Volk: Institut für Zelluläre und Molekulare Physiologie, Friedrich-Alexander-Universität Erlangen-Nürnberg, Waldstrasse 6, 91054 Erlangen, Germany. michael.wagner@fau.de or tilmann.volk@fau.de. Information on purchasing reprints may be found at [www.anesthesiology.org](http://www.anesthesiology.org) or on the masthead page at the beginning of this issue. ANESTHESIOLOGY's articles are made freely accessible to all readers, for personal use only, 6 months from the cover date of the issue.

## References

1. Zink W, Graf BM: [Toxicology of local anesthetics. Clinical, therapeutic and pathological mechanisms]. *Anaesthesist* 2003; 52:1102–23
2. Butterworth JF IV: Models and mechanisms of local anesthetic cardiac toxicity: A review. *Reg Anesth Pain Med* 2010; 35:167–76
3. Weinberg GL, VadeBoncouer T, Ramaraju GA, Garcia-Amaro MF, Cwik MJ: Pretreatment or resuscitation with a lipid infusion shifts the dose-response to bupivacaine-induced asystole in rats. *ANESTHESIOLOGY* 1998; 88:1071–5
4. Weinberg G, Ripper R, Feinstein DL, Hoffman W: Lipid emulsion infusion rescues dogs from bupivacaine-induced cardiac toxicity. *Reg Anesth Pain Med* 2003; 28:198–202
5. Rosenblatt MA, Abel M, Fischer GW, Itzkovich CJ, Eisenkraft JB: Successful use of a 20% lipid emulsion to resuscitate a patient after a presumed bupivacaine-related cardiac arrest. *ANESTHESIOLOGY* 2006; 105:217–8

6. Litz RJ, Popp M, Stehr SN, Koch T: Successful resuscitation of a patient with ropivacaine-induced asystole after axillary plexus block using lipid infusion. *Anaesthesia* 2006; 61:800–1
7. French D, Smollin C, Ruan W, Wong A, Drasner K, Wu AH: Partition constant and volume of distribution as predictors of clinical efficacy of lipid rescue for toxicological emergencies. *Clin Toxicol (Phila)* 2011; 49:801–9
8. Soar J, Perkins GD, Abbas G, Alfonso A, Barelli A, Bierens JJ, Brugger H, Deakin CD, Dunning J, Georgiou M, Handley AJ, Lockett DJ, Paal P, Sandroni C, Thies KC, Zideman DA, Nolan JP: European Resuscitation Council Guidelines for Resuscitation 2010 Section 8. Cardiac arrest in special circumstances: Electrolyte abnormalities, poisoning, drowning, accidental hypothermia, hyperthermia, asthma, anaphylaxis, cardiac surgery, trauma, pregnancy, electrocution. *Resuscitation* 2010; 81:1400–33
9. Weinberg G, Lin B, Zheng S, Di Gregorio G, Hiller D, Ripper R, Edelman L, Kelly K, Feinstein D: Partitioning effect in lipid resuscitation: Further evidence for the lipid sink. *Crit Care Med* 2010; 38:2268–9
10. Zausig YA, Zink W, Keil M, Sinner B, Barwing J, Wiese CH, Graf BM: Lipid emulsion improves recovery from bupivacaine-induced cardiac arrest, but not from ropivacaine- or mepivacaine-induced cardiac arrest. *Anesth Analg* 2009; 109: 1323–6
11. Mazoit JX, Le Guen R, Beloeil H, Benhamou D: Binding of long-lasting local anesthetics to lipid emulsions. *ANESTHESIOLOGY* 2009; 110:380–6
12. Laine J, Lokajová J, Parshintsev J, Holopainen JM, Wiedmer SK: Interaction of a commercial lipid dispersion and local anesthetics in human plasma: Implications for drug trapping by “lipid-sinks”. *Anal Bioanal Chem* 2010; 396:2599–607
13. Chen Y, Xia Y, Liu L, Shi T, Shi K, Wang Q, Chen L, Papadimos TJ, Xu X: Lipid emulsion reverses bupivacaine-induced asystole in isolated rat hearts: Concentration-response and time-response relationships. *ANESTHESIOLOGY* 2010; 113:1320–5
14. Dix SK, Rosner GF, Nayar M, Harris JJ, Guglin ME, Winterfield JR, Xiong Z, Mudge GH Jr: Intractable cardiac arrest due to lidocaine toxicity successfully resuscitated with lipid emulsion. *Crit Care Med* 2011; 39:872–4
15. Ozcan MS, Weinberg G: Update on the use of lipid emulsions in local anesthetic systemic toxicity: A focus on differential efficacy and lipid emulsion as part of advanced cardiac life support. *Int Anesthesiol Clin* 2011; 49:91–103
16. Harvey M, Cave G, Chanwai G, Nicholson T: Successful resuscitation from bupivacaine-induced cardiovascular collapse with intravenous lipid emulsion following femoral nerve block in an emergency department. *Emerg Med Australas* 2011; 23:209–14
17. Isenberg G, Klockner U: Calcium tolerant ventricular myocytes prepared by preincubation in a “KB medium”. *Pflügers Arch* 1982; 395:6–18
18. Foltz WU, Wagner M, Rudakova E, Volk T: N-acetylcysteine prevents electrical remodeling and attenuates cellular hypertrophy in epicardial myocytes of rats with ascending aortic stenosis. *Basic Res Cardiol* 2012; 107:290
19. Bénitah JP, Vassort G: Aldosterone upregulates  $\text{Ca}^{2+}$  current in adult rat cardiomyocytes. *Circ Res* 1999; 85:1139–45
20. Hamill OP, Marty A, Neher E, Sakmann B, Sigworth FJ: Improved patch-clamp techniques for high-resolution current recording from cells and cell-free membrane patches. *Pflügers Arch* 1981; 391:85–100
21. Isenberg G: Cardiac Purkinje fibers: Cesium as a tool to block inward rectifying potassium currents. *Pflügers Arch* 1976; 365:99–106
22. Colin P, Sirois G, Leloir J: High-performance liquid chromatography determination of dipotassium clorazepate and its major metabolite nordiazepam in plasma. *J Chromatogr* 1983; 273:367–77
23. Nagele P: Misuse of standard error of the mean (SEM) when reporting variability of a sample. A critical evaluation of four anaesthesia journals. *Br J Anaesth* 2003; 90:514–6
24. Nau C, Wang SY, Strichartz GR, Wang GK: Block of human heart hH1 sodium channels by the enantiomers of bupivacaine. *ANESTHESIOLOGY* 2000; 93:1022–33
25. Castle NA: Bupivacaine inhibits the transient outward  $\text{K}^{+}$  current but not the inward rectifier in rat ventricular myocytes. *J Pharmacol Exp Ther* 1990; 255:1038–46
26. Solth A, Siebrands CC, Friederich P: Inhibition of  $\text{Kv}4.3/\text{KChIP}2.2$  channels by bupivacaine and its modulation by the pore mutation  $\text{Kv}4.3\text{V}401\text{I}$ . *ANESTHESIOLOGY* 2005; 103:796–804
27. Volk T, Nguyen TH, Schultz JH, Faulhaber J, Ehmke H: Regional alterations of repolarizing  $\text{K}^{+}$  currents among the left ventricular free wall of rats with ascending aortic stenosis. *J Physiol* 2001; 530(Pt 3):443–55
28. Weinberg GL: Lipid resuscitation: More than a sink. *Crit Care Med* 2012; 40:2521–3
29. Valenzuela C, Snyder DJ, Bennett PB, Tamargo J, Hondeghem LM: Stereoselective block of cardiac sodium channels by bupivacaine in guinea pig ventricular myocytes. *Circulation* 1995; 92:3014–24
30. Butterworth JF IV, Strichartz GR: Molecular mechanisms of local anesthesia: A review. *ANESTHESIOLOGY* 1990; 72: 711–34
31. Clarkson CW, Hondeghem LM: Mechanism for bupivacaine depression of cardiac conduction: Fast block of sodium channels during the action potential with slow recovery from block during diastole. *ANESTHESIOLOGY* 1985; 62:396–405
32. Lopreato GF, Lu Y, Southwell A, Atkinson NS, Hillis DM, Wilcox TP, Zakon HH: Evolution and divergence of sodium channel genes in vertebrates. *Proc Natl Acad Sci U S A* 2001; 98:7588–92
33. Bräu ME, Branitzki P, Olschewski A, Vogel W, Hempelmann G: Block of neuronal tetrodotoxin-resistant  $\text{Na}^{+}$  currents by stereoisomers of piperidine local anesthetics. *Anesth Analg* 2000; 91:1499–505
34. Wagner M, Riepe KG, Eberhardt E, Volk T: Open channel block of the fast transient outward  $\text{K}^{+}$  current by primaquine and chloroquine in rat left ventricular cardiomyocytes. *Eur J Pharmacol* 2010; 647:13–20
35. Reiz S, Nath S: Cardiotoxicity of local anaesthetic agents. *Br J Anaesth* 1986; 58:736–46
36. Knudsen K, Beckman Suurküla M, Blomberg S, Sjövall J, Edvardsson N: Central nervous and cardiovascular effects of i.v. infusions of ropivacaine, bupivacaine and placebo in volunteers. *Br J Anaesth* 1997; 78:507–14
37. Chang DH, Ladd LA, Copeland S, Iglesias MA, Plummer JL, Mather LE: Direct cardiac effects of intracoronary bupivacaine, levobupivacaine and ropivacaine in the sheep. *Br J Pharmacol* 2001; 132:649–58
38. Sánchez-Chapula J: Effects of bupivacaine on membrane currents of guinea-pig ventricular myocytes. *Eur J Pharmacol* 1988; 156:303–8
39. Lipka LJ, Jiang M, Tseng GN: Differential effects of bupivacaine on cardiac  $\text{K}^{+}$  channels: Role of channel inactivation and subunit composition in drug-channel interaction. *J Cardiovasc Electrophysiol* 1998; 9:727–42
40. Friederich P, Solth A, Schillemeit S, Isbrandt D: Local anaesthetic sensitivities of cloned HERG channels from human heart: Comparison with HERG/MiRP1 and HERG/MiRP1 T8A. *Br J Anaesth* 2004; 92:93–101
41. Schwoerer AP, Zenouzi R, Ehmke H, Friederich P: Bupivacaine destabilizes action potential duration in cellular



- and computational models of long QT syndrome 1. *Anesth Analg* 2011; 113:1365–73
42. Ferezou J, Bach AC: Structure and metabolic fate of triacylglycerol- and phospholipid-rich particles of commercial par-enteral fat emulsions. *Nutrition* 1999; 15:44–50
  43. Curry FE: Determinants of capillary permeability: A review of mechanisms based on single capillary studies in the frog. *Circ Res* 1986; 59:367–80
  44. Sarin H: Physiologic upper limits of pore size of different blood capillary types and another perspective on the dual pore theory of microvascular permeability. *J Angiogenesis Res* 2010; 2:14
  45. Bach AC, Frey A, Lutz O: Clinical and experimental effects of medium-chain-triglyceride-based fat emulsions—A review. *Clin Nutr* 1989; 8:223–35
  46. Mottram AR, Valdivia CR, Makielski JC: Fatty acids antagonize bupivacaine-induced  $I_{Na}$  blockade. *Clin Toxicol (Phila)* 2011; 49:729–33
  47. Ruan W, French D, Wong A, Drasner K, Wu AH: A mixed (long- and medium-chain) triglyceride lipid emulsion extracts local anesthetic from human serum *in vitro* more effectively than a long-chain emulsion. *ANESTHESIOLOGY* 2012; 116:334–9
  48. Litonius E, Tarkkila P, Neuvonen PJ, Rosenberg PH: Effect of intravenous lipid emulsion on bupivacaine plasma concentration in humans. *Anaesthesia* 2012; 67:600–5
  49. Litonius ES, Niiya T, Neuvonen PJ, Rosenberg PH: Intravenous lipid emulsion only minimally influences bupivacaine and mepivacaine distribution in plasma and does not enhance recovery from intoxication in pigs. *Anesth Analg* 2012; 114:901–6
